# Supplementary material for: Apoptosis induction by Co-MGC and Ni-MGC against pancreatic cancer cells and their interaction with DNA
Source: Royal Society of Chemistry journal article supplement (doi:10.1039/d5tb01461a), 2025-01-01
Supplement: d5tb01461a1.pdf [file d5tb01461a1.pdf]

## **1. Experimental Materials**

### **1.1 Reagents and Chemicals**

All chemicals and reagents were of analytical grade and used without further purification unless specified. 4-((4-(Pyridin-3-yl) pyrimidin-2-ylamino) methyl) benzoic acid (MGC),  $\text{CoCl}_2 \cdot 6\text{H}_2\text{O}$ ,  $\text{NiCl}_2 \cdot 6\text{H}_2\text{O}$ , and N,N-dimethylformamide (DMF) were purchased from Sinochem Pharmaceuticals. Human pancreatic cancer cells (BxPC-3) were obtained from Procell Life Science & Technology Co., Ltd. (Wuhan, China). FITC and propidium iodide (PI) were sourced from BD Biosciences. Plasmid pBR322 DNA and calf thymus DNA (CT-DNA) were acquired from Sigma-Aldrich. Staining buffer, RNase A, and PI were supplied by Biosharp.

### **1.2 Cell Culture**

Incubate BxPC-3, Panc-1, L929 cells in a humidified incubator at 37°C with 5%  $\text{CO}_2$ . cells were cultured in RPMI 1640 or DMEM medium, supplemented with fetal bovine serum (FBS), streptomycin, and penicillin.

### **1.3 ROS Scavenging Assay**

BxPC-3 cells were stained with 2,7-dichlorodihydrofluorescein diacetate (DCFH-DA, Sigma-Aldrich). Cells ( $5 \times 10^3$ ) from culture dishes were treated with 10 mM N-acetyl-L-cysteine (NAC), followed by co-treatment with 50  $\mu\text{M}$  Co-MGC or 50  $\mu\text{M}$  Ni-MGC for 24 h. Subsequently, the culture medium was aspirated, and the cells were washed with ice-cold phosphate-buffered saline (PBS, 1X). The cells were then detached using EDTA-free trypsin and centrifuged at 1500 rpm for 4 minutes. After two washes with PBS, the cell pellet was resuspended in 100  $\mu\text{L}$  of binding buffer. Next, 5  $\mu\text{L}$  of Annexin V-FITC and 5  $\mu\text{L}$  of propidium iodide (PI) were added, followed by incubation in the dark for 15 minutes. Finally, 400  $\mu\text{L}$  of binding buffer was added, and the samples were filtered and analyzed using an Accuri C6 flow cytometer.

## 2. Crystallographic Data

**Tab. S1** Crystallographic data for Co-MGC and Ni-MGC.

| Empirical formula                              | <b>C<sub>37</sub>H<sub>37</sub>CoN<sub>9</sub>O<sub>7</sub></b>  |
|------------------------------------------------|------------------------------------------------------------------|
| Formula weight                                 | 778.68                                                           |
| Temperature/K                                  | 300.15                                                           |
| Crystal system                                 | monoclinic                                                       |
| Space group                                    | Pc                                                               |
| a/Å                                            | 14.0516(5)                                                       |
| b/Å                                            | 6.7554(2)                                                        |
| c/Å                                            | 20.0211(7)                                                       |
| $\alpha/^\circ$                                | 90                                                               |
| $\beta/^\circ$                                 | 108.084(4)                                                       |
| $\gamma/^\circ$                                | 90                                                               |
| Volume/Å <sup>3</sup>                          | 1806.61(11)                                                      |
| Z                                              | 2                                                                |
| $\rho_{\text{calc}}/\text{g}/\text{cm}^3$      | 1.431                                                            |
| $\mu/\text{mm}^{-1}$                           | 4.255                                                            |
| F(000)                                         | 810.0                                                            |
| Radiation                                      | CuK $\alpha$ ( $\lambda = 1.54184$ )                             |
| 2 $\Theta$ range for data collection/ $^\circ$ | 9.294 to 159.652                                                 |
| Index ranges                                   | $-16 \leq h \leq 15$ , $-7 \leq k \leq 5$ , $-24 \leq l \leq 24$ |
| Reflections collected                          | 8820                                                             |
| Independent reflections                        | 4391 [ $R_{\text{int}} = 0.0274$ , $R_{\text{sigma}} = 0.0355$ ] |
| Data/restraints/parameters                     | 4391/14/469                                                      |
| Goodness-of-fit on F <sup>2</sup>              | 1.137                                                            |
| Final R indexes [ $I \geq 2\sigma(I)$ ]        | $R_1 = 0.0476$ , $wR_2 = 0.1197$                                 |
| Final R indexes [all data]                     | $R_1 = 0.0612$ , $wR_2 = 0.1593$                                 |
| Largest diff. peak/hole / e Å <sup>-3</sup>    | 0.70/-0.83                                                       |
| Flack parameter                                | 0.384(10)                                                        |

  

| Empirical formula | <b>C<sub>34</sub>H<sub>32</sub>N<sub>8</sub>NiO<sub>6</sub></b> |
|-------------------|-----------------------------------------------------------------|
| Formula weight    | 707.38                                                          |
| Temperature/K     | 299.15                                                          |
| Crystal system    | monoclinic                                                      |
| Space group       | Pc                                                              |
| a/Å               | 13.93393(16)                                                    |
| b/Å               | 6.73940(6)                                                      |
| c/Å               | 20.0825(2)                                                      |
| $\alpha/^\circ$   | 90                                                              |

|                                                |                                                             |
|------------------------------------------------|-------------------------------------------------------------|
| $\beta/^\circ$                                 | 107.9299(13)                                                |
| $\gamma/^\circ$                                | 90                                                          |
| Volume/ $\text{\AA}^3$                         | 1794.29(4)                                                  |
| Z                                              | 2                                                           |
| $\rho_{\text{calc}}/\text{g/cm}^3$             | 1.309                                                       |
| $\mu/\text{mm}^{-1}$                           | 1.231                                                       |
| F(000)                                         | 736.0                                                       |
| Radiation                                      | CuK $\alpha$ ( $\lambda = 1.54184$ )                        |
| 2 $\Theta$ range for data collection/ $^\circ$ | 6.668 to 136.384                                            |
| Index ranges                                   | $-16 \leq h \leq 16, -7 \leq k \leq 8, -23 \leq l \leq 23$  |
| Reflections collected                          | 8660                                                        |
| Independent reflections                        | 8660 [ $R_{\text{int}} = ?$ , $R_{\text{sigma}} = 0.0375$ ] |
| Data/restraints/parameters                     | 8660/11/460                                                 |
| Goodness-of-fit on $F^2$                       | 1.057                                                       |
| Final R indexes [ $I \geq 2\sigma(I)$ ]        | $R_1 = 0.0439$ , $wR_2 = 0.1228$                            |
| Final R indexes [all data]                     | $R_1 = 0.0445$ , $wR_2 = 0.1236$                            |
| Largest diff. peak/hole / $e \text{ \AA}^{-3}$ | 0.42/-0.47                                                  |
| Flack parameter                                | 0.62(3)                                                     |

**Tab. S2** The fractional bonding length of Co-MGC and Ni-MGC.

| Atom | Atom              | Length/ $\text{\AA}$ |
|------|-------------------|----------------------|
| Co01 | O002              | 2.140(6)             |
| Co01 | O003              | 2.071(8)             |
| Co01 | O005              | 2.175(6)             |
| Co01 | N007 <sup>1</sup> | 2.180(7)             |
| Co01 | O00A              | 2.048(8)             |
| Co01 | N00I <sup>2</sup> | 2.180(8)             |

<sup>1</sup>+X,2-Y,-1/2+Z; <sup>2</sup>+X,-Y,1/2+Z

| Atom | Atom | Length/ $\text{\AA}$ |
|------|------|----------------------|
| Ni1  | O24  | 2.059(4)             |
| Ni1  | O47  | 2.046(4)             |
| Ni1  | O48  | 2.121(4)             |
| Ni1  | N8   | 2.115(4)             |
| Ni1  | O49  | 2.090(4)             |
| Ni1  | N31  | 2.123(4)             |

<sup>1</sup>+X,2-Y,1/2+Z; <sup>2</sup>+X,-Y,-1/2+Z

**Tab. S3** The selected bond angles of Co-MGC and Ni-MGC.

| <b>Atom Atom Atom</b>       | <b>Angle/°</b> | <b>Atom Atom Atom</b>       | <b>Angle/°</b> |
|-----------------------------|----------------|-----------------------------|----------------|
| O002 Co01 O005              | 173.4(3)       | O005 Co01 N007 <sup>1</sup> | 91.7(3)        |
| O002 Co01 N007 <sup>1</sup> | 93.9(3)        | O005 Co01 N00I <sup>2</sup> | 88.8(3)        |
| O002 Co01 N00I <sup>2</sup> | 85.6(3)        | O00A Co01 O002              | 91.9(3)        |
| O003 Co01 O002              | 90.8(3)        | O00A Co01 O003              | 177.3(3)       |
| O003 Co01 O005              | 93.0(3)        | O00A Co01 O005              | 84.3(3)        |
| O003 Co01 N007 <sup>1</sup> | 86.8(3)        | O00A Co01 N007 <sup>1</sup> | 93.0(3)        |
| O003 Co01 N00I <sup>2</sup> | 92.2(3)        | O00A Co01 N00I <sup>2</sup> | 88.0(3)        |
| <b>Atom Atom Atom</b>       | <b>Angle/°</b> | <b>Atom Atom Atom</b>       | <b>Angle/°</b> |
| C22 O24 Ni1                 | 127.3(4)       | C9 N8 Ni1                   | 120.3(3)       |
| C45 O47 Ni1                 | 126.1(4)       | C32 N31 Ni1                 | 121.6(4)       |
| C13 N8 Ni1                  | 121.4(4)       | C36 N31 Ni1                 | 120.9(4)       |

### 3. Supplementary Experimental Data

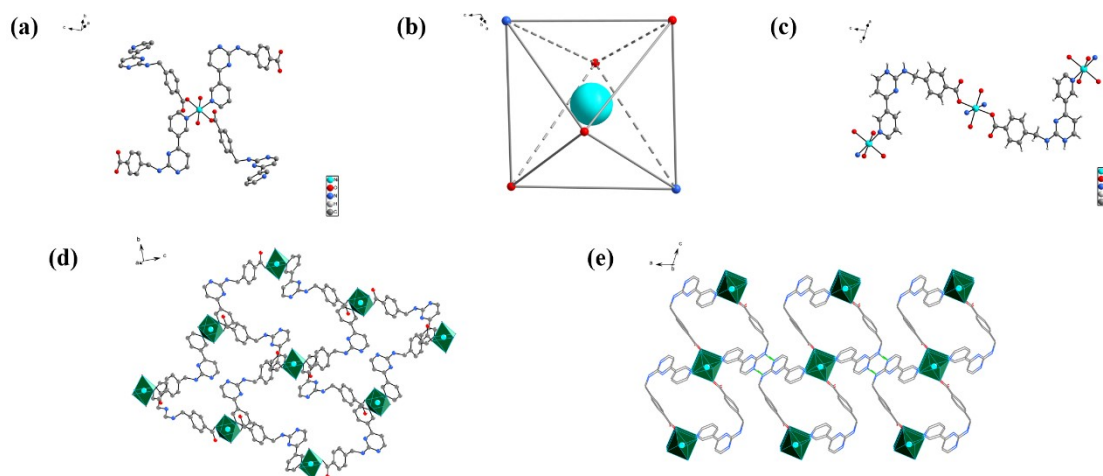

Fig. S1. Single - crystal structure of Ni - MGC (C, gray; O, red; N, deep blue; Ni, sky blue; all hydrogen atoms are omitted for clarity): (a) Coordination environment of Ni; (b) Symmetrical unit of Ni - MGC; (c) Coordination mode of ligand; (d) 2D structure; (e) 3D structure.

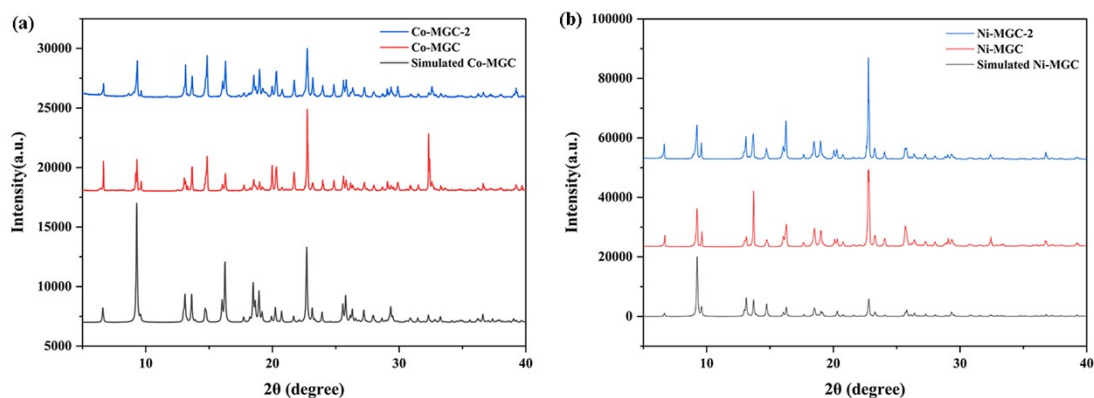

Fig. S2. XRD patterns of different batches of Co-MGC and Ni-MGC

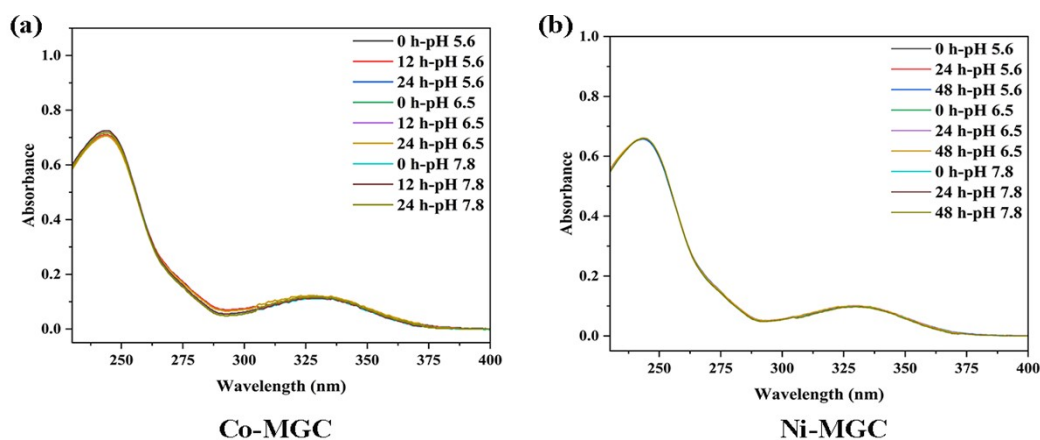

Fig. S3. (a) and (b) Stability of Co-MGC and Ni-MGC in buffer solutions at pH 7.4, pH 6.5, and pH 5.6 at different time points (0h, 24h and 48h)

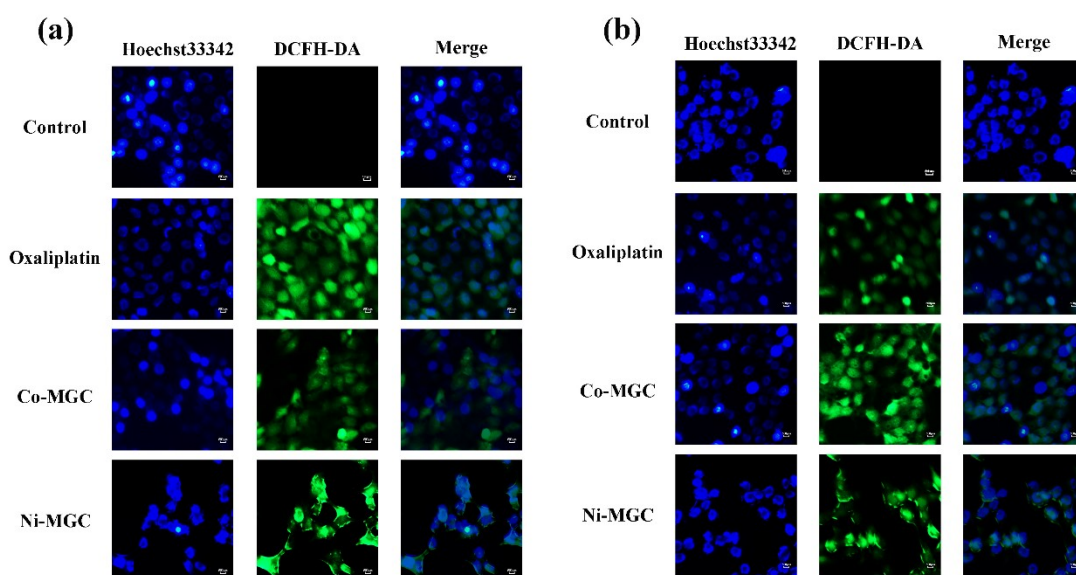

Fig. S4. Fluorescence imaging of ROS in BxPC - 3 cells (scale bar: 500  $\mu\text{m}$ ): (a) Cycle 2; (b) Cycle 3.

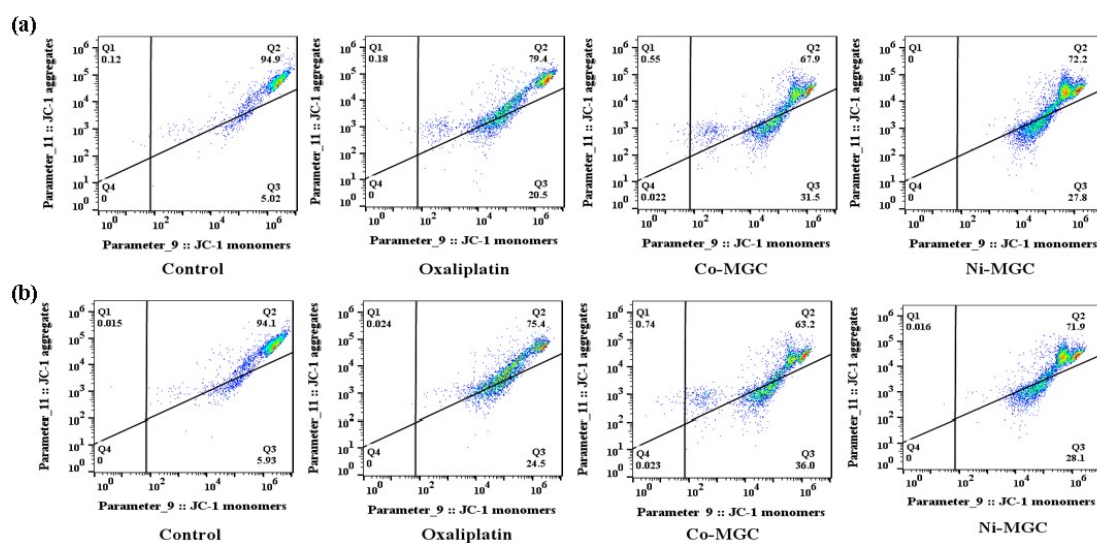

Fig. S5. JC-1 flow cytometry analysis of mitochondrial membrane potential ( $\Delta\Psi\text{m}$ ). Membrane potential detection in untreated cells, cells treated with oxaliplatin (50  $\mu\text{M}$ ), Co-MGC (50  $\mu\text{M}$ ), or Ni-MGC (50  $\mu\text{M}$ ) for 24 hours: (a) Cycle 2; (b) Cycle 3.

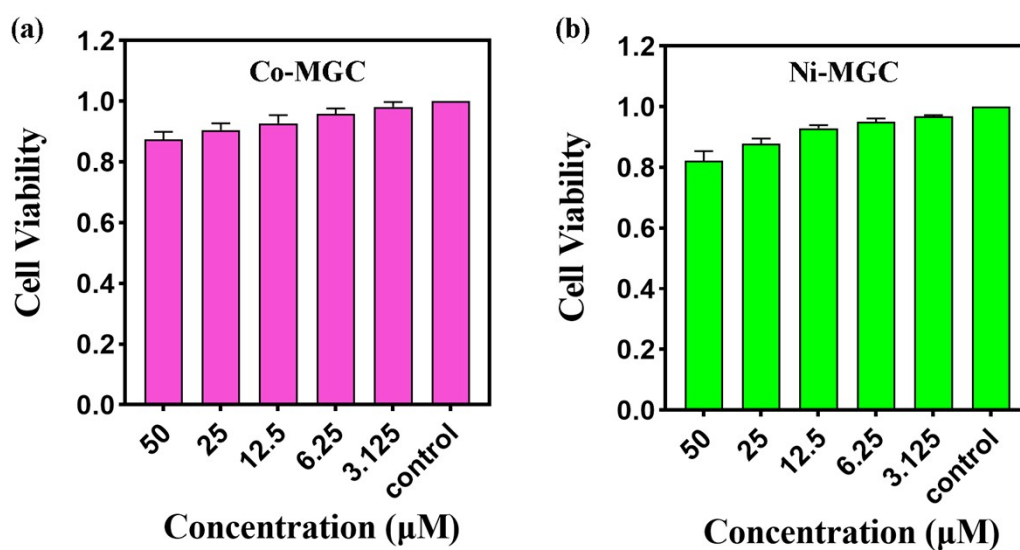

Fig. S6. Schematic diagram of cytotoxicity of Co-MGC and Ni-MGC on L929 cells

Tab. S4. Cytotoxicity of Co-MGC, Ni-MGC, in BxPC-3 and Panc-1 cells.

| Complex | BxPC-3[IC <sub>50</sub> (μM)] | Panc-1[IC <sub>50</sub> (μM)] |
|---------|-------------------------------|-------------------------------|
| Co-MGC  | 8.28±2.32                     | 37.98±6.76                    |
| Ni-MGC  | 10.23±2.89                    | 58.2±13.64                    |

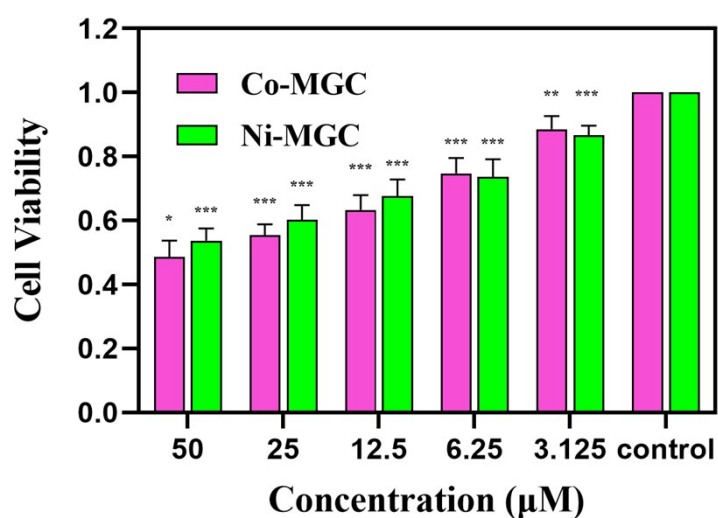

Fig. S7. Schematic diagram of cytotoxicity of Co MGC and Ni MGC on Panc-1 cells Values are expressed as mean  $\pm$  SD. \* $p < 0.05$ , \*\* $p < 0.01$ , \*\*\* $p < 0.001$ .

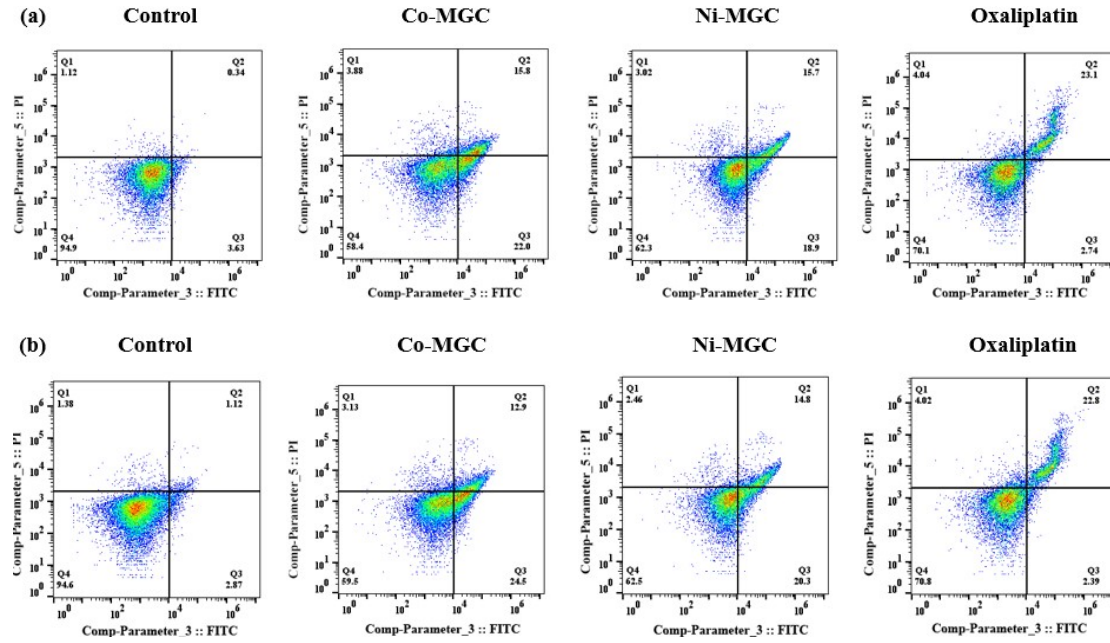

Fig. S8. Apoptosis induction in BxPC-3 cells after 24-hour incubation with Co-MGC, Ni-MGC, and Oxaliplatin: (a) Cycle 2; (b) Cycle 3.

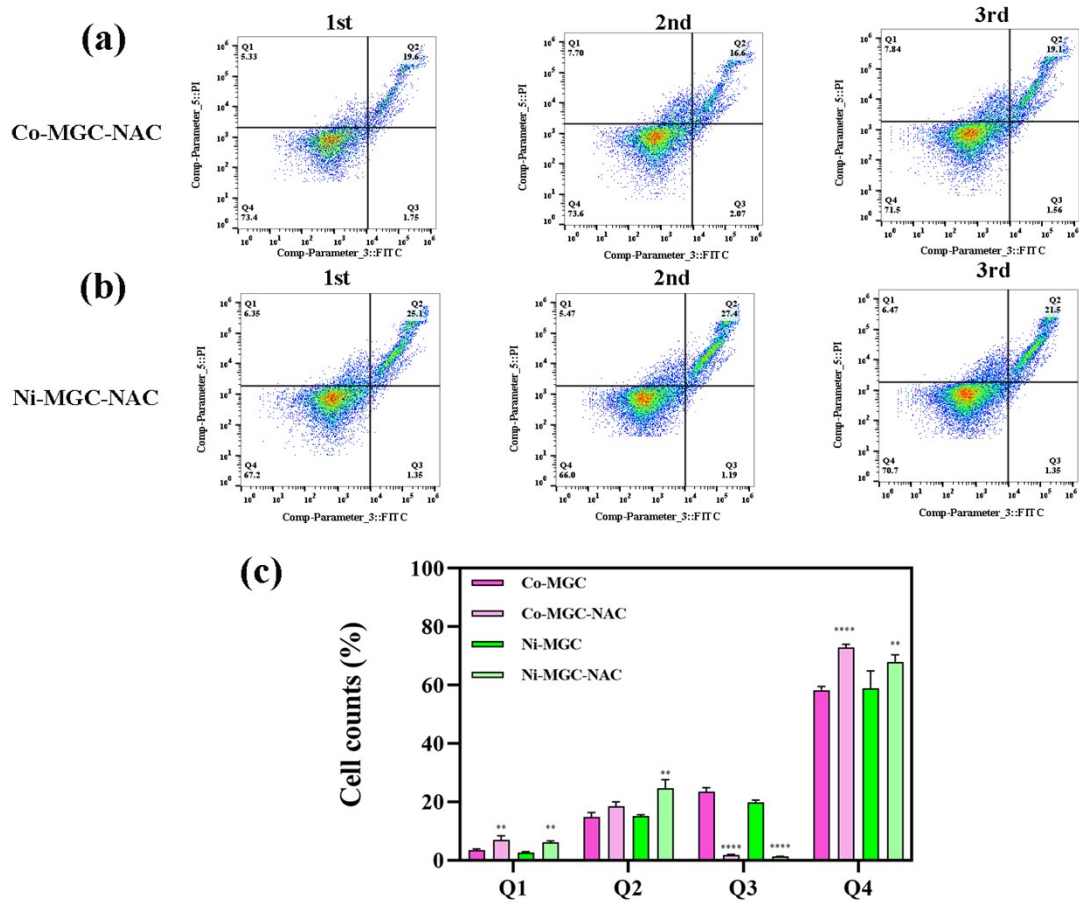

Fig. S9. Apoptosis and cell cycle distribution of BxPC-3 cells after co incubation with Co MGC, Ni MGC, and NAC for 24 hours. Values are expressed as mean  $\pm$  SD. \* $p < 0.05$ , \*\* $p < 0.01$ , \*\*\* $p < 0.001$ .



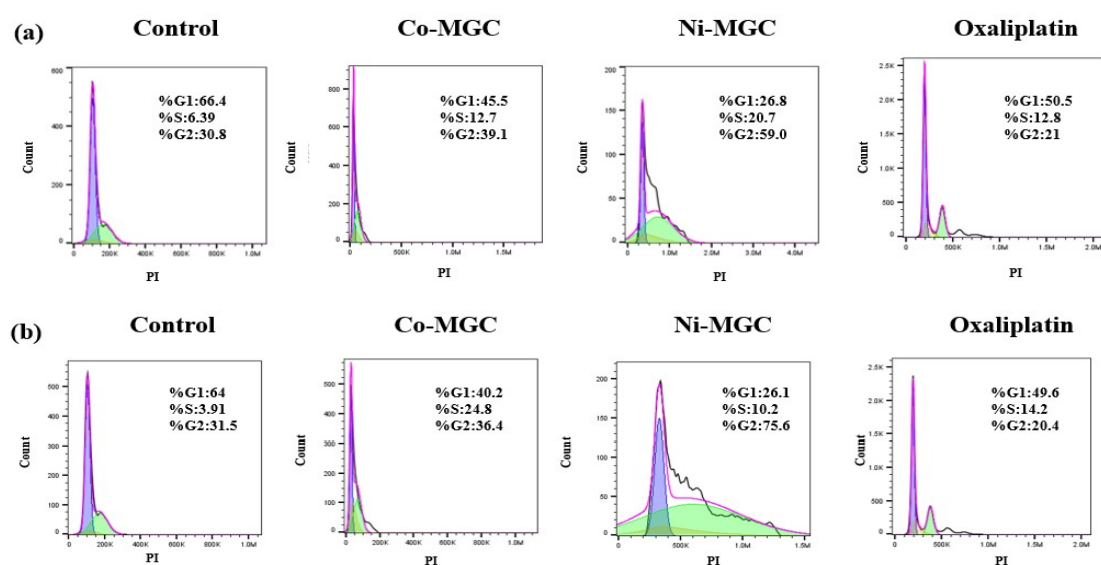

Fig. S10. Cell cycle distribution in BxPC-3 cells after 24-hour incubation with Co-MGC, Ni-MGC, and Oxaliplatin: (a) Cycle 2; (b) Cycle 3.

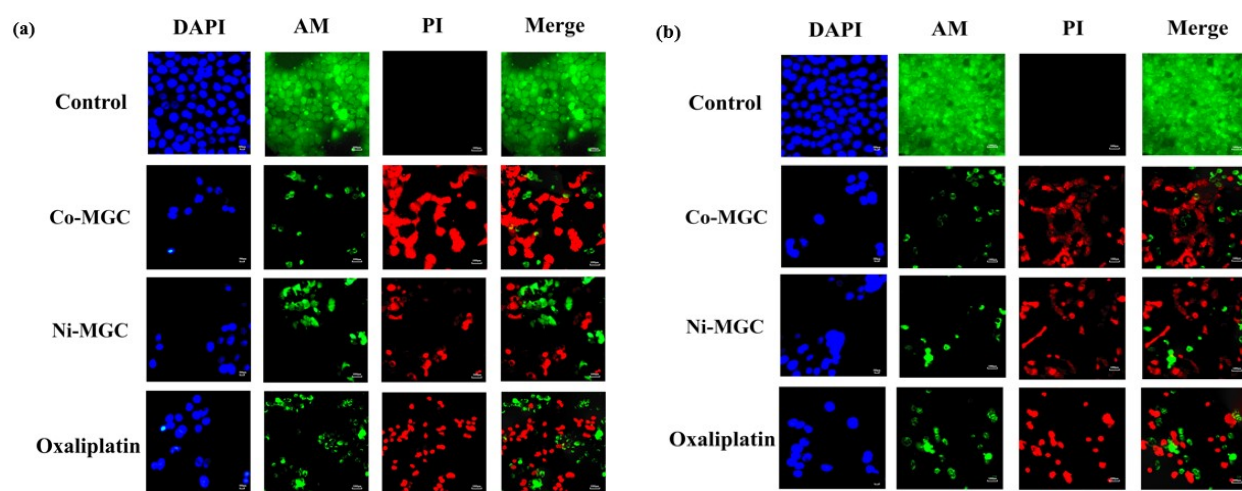

Fig. S11. Fluorescence images of BxPC-3 cells stained with DAPI (scale bar: 500  $\mu$ m) and AM/PI co-staining images (scale bar: 1000  $\mu$ m) following different treatments: (a) Cycle 2; (b) Cycle 3.
